# Supplementary material for: A QCM-based ‘on–off’ mechanistic study of gas adsorption by plasmid DNA and DNA–[Bmim][PF6] construct
Source: Royal Society of Chemistry journal article supplement (doi:10.1039/c6ra14759c), 2016-01-01
Supplement: c6ra14759c1.pdf [file c6ra14759c1.pdf]

**Supplementary information:**

A QCM based ‘on-off’ mechanistic study of gas  
adsorption by plasmid DNA and DNA-[Bmim][PF<sub>6</sub>]  
construct

*Sarvesh Kumar Soni<sup>‡\*</sup>, K. M. Mohibul Kabir<sup>‡#</sup>, Ravichandar Babarao<sup>§</sup>, Victoria E Coyle<sup>#</sup>,  
Sampa Sarkar<sup>#</sup>, Ylias M. Sabri<sup>‡\*</sup>, Suresh K Bhargava<sup>‡\*</sup>*

<sup>#</sup> Centre for Advanced Materials and Industrial Chemistry<sup>#</sup>, School of Science, RMIT  
University, Melbourne, VIC, Australia, 3001.

<sup>§</sup> CSIRO Manufacturing Flagship, Private Bag 10, Clayton South MDC, VIC, 3169, Australia

<sup>‡</sup> School of Science, RMIT University, Melbourne, VIC, Australia, 3001.

Corresponding authors:

\*E.mail: [Sarveshkumar.soni@rmit.edu.au](mailto:Sarveshkumar.soni@rmit.edu.au), [ylias.sabri@rmit.edu.au](mailto:ylias.sabri@rmit.edu.au),  
[suresh.bhargava@rmit.edu.au](mailto:suresh.bhargava@rmit.edu.au)

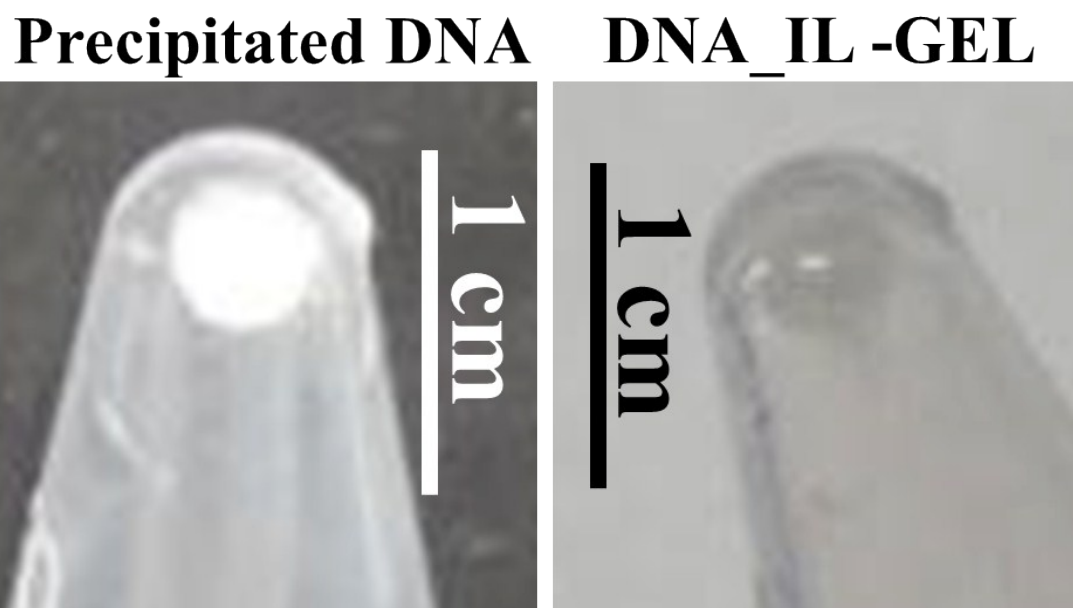

**Figure S1.** Photographic image of precipitated (by chilled ethanol) pristine DNA and DNA gel after interaction with ionic liquid [Bmim][PF<sub>6</sub>].

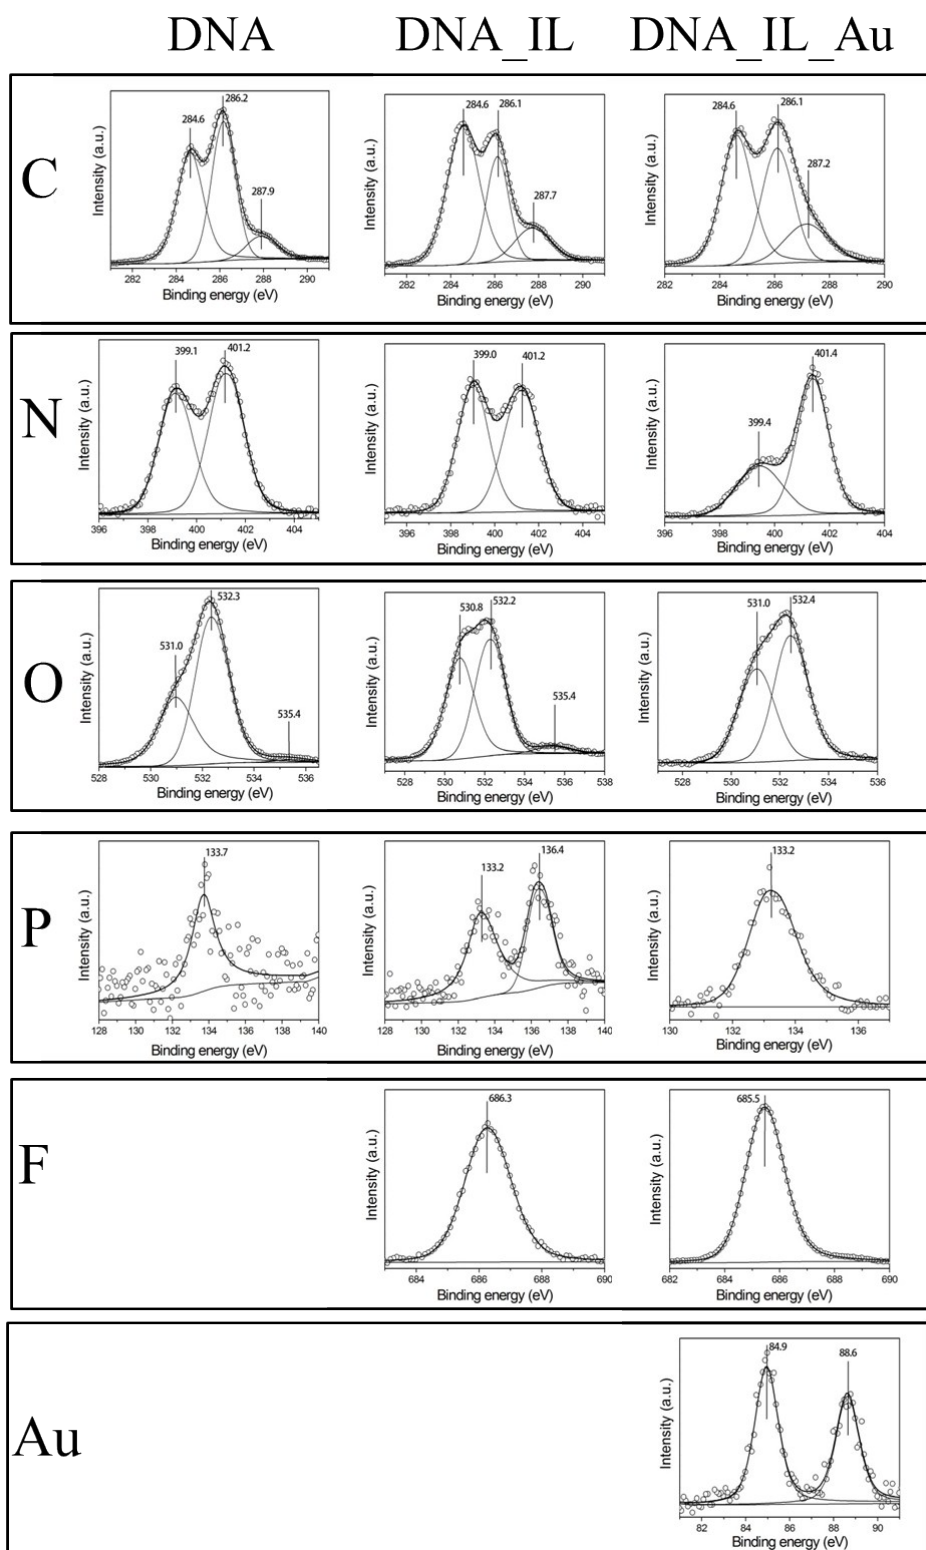

Figure S2. XPS spectra of DNA, DNA-IL and DNA-IL-Au showing deconvoluted raw spectra.

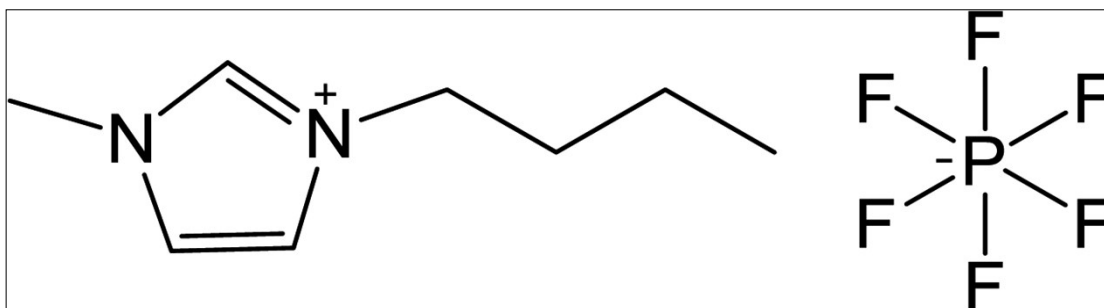

**Figure S3.** Molecular structure of ionic liquid [Bmim]PF<sub>6</sub>.

**Table S1.** Gaussian fitting values obtained from the IR adsorption spectra (Fig. 4) for [Bmim][PF<sub>6</sub>]

|                      |      |  |                |      |
|----------------------|------|--|----------------|------|
| $\nu_{ss}HC(4)C(5)H$ | 3162 |  | $\nu_{FR}CH_3$ | 2939 |
| $\nu_{as}HC(4)C(5)H$ | 3122 |  | $\nu_{ss}CH_3$ | 2870 |
| $\nu_{as}CH_3$       | 2965 |  |                |      |

Note: ss, as, and FR represent the symmetric stretch, the antisymmetric stretch, and the Fermi resonance, respectively)
